# Supplementary material for: Bis(phosphinimino)methanide borohydride complexes of the rare-earth elements as initiators for the polymerization of methyl methacrylate: combined experimental and computational investigations
Source: Royal Society of Chemistry journal article supplement (doi:10.1039/c1py00133g), 2011-01-01

## Electronic Supplementary Informations

### Bis(phosphinimino)methanide Borohydride Complexes of the Rare-Earth

#### Elements as Initiators for the Polymerization of Methyl Methacrylate:

#### Combined Experimental and Computational Investigations

Sophie M. Guillaume,<sup>[a]\*</sup> Pierre Brignou,<sup>[a]</sup> Nicolas Susperregui,<sup>[b]</sup> Laurent Maron,<sup>[b]\*</sup>

Magdalena Kuzdrowska,<sup>[c]</sup> and Peter W. Roesky<sup>\*,[c]</sup>

All coordinates of all optimized complexes are given in the following.

#### Yttrium complexes

##### Add A

|    |            |           |           |
|----|------------|-----------|-----------|
| C  | -10.505846 | 3.280860  | -0.822810 |
| P  | -10.022785 | 3.036729  | 0.946520  |
| C  | -10.866511 | 1.460415  | 1.395590  |
| N  | -8.392225  | 2.991873  | 1.127869  |
| Si | -7.264704  | 2.108139  | 0.134154  |
| C  | -10.615957 | 4.234706  | 2.099746  |
| P  | -10.386705 | 5.974593  | 1.883693  |
| C  | -11.075595 | 6.719301  | 0.335320  |
| C  | -11.372030 | 6.785280  | 3.208622  |
| Si | -7.929512  | 7.723260  | 1.681123  |
| N  | -8.767128  | 6.223130  | 2.005590  |
| Y  | -8.032475  | 4.270174  | 3.128878  |
| O  | -8.148117  | 2.063716  | 4.060396  |
| C  | -8.098512  | 1.136894  | 4.868539  |
| O  | -6.989857  | 0.454858  | 5.102911  |
| C  | -5.803776  | 0.866525  | 4.394529  |
| C  | -9.251944  | 0.654946  | 5.671215  |
| C  | -9.104714  | -0.629369 | 6.435714  |
| C  | -10.347537 | 1.426091  | 5.696287  |
| B  | -5.549747  | 4.410969  | 2.878544  |
| H  | -6.003852  | 3.393052  | 2.339620  |
| H  | -4.360858  | 4.501087  | 2.740198  |
| H  | -6.147927  | 5.371001  | 2.370258  |
| H  | -5.883199  | 4.370169  | 4.067483  |
| B  | -8.646881  | 5.077078  | 5.458145  |
| H  | -8.140933  | 5.980994  | 4.787807  |
| H  | -9.605701  | 4.629458  | 4.803266  |

|   |            |           |           |
|---|------------|-----------|-----------|
| H | -9.012433  | 5.458965  | 6.538940  |
| H | -7.814234  | 4.172572  | 5.539909  |
| H | -10.384308 | 2.368893  | 5.159803  |
| H | -11.214321 | 1.142242  | 6.285971  |
| H | -8.297310  | -0.557327 | 7.171123  |
| H | -10.031824 | -0.869047 | 6.961177  |
| H | -8.854683  | -1.463499 | 5.771897  |
| H | -5.549919  | 1.897550  | 4.646438  |
| H | -5.962035  | 0.788028  | 3.317277  |
| H | -5.023435  | 0.182362  | 4.723978  |
| H | -10.660484 | 1.243539  | 2.445541  |
| H | -10.466855 | 0.655098  | 0.773964  |
| H | -11.945304 | 1.541920  | 1.236370  |
| H | -10.191985 | 2.414756  | -1.411436 |
| H | -11.588571 | 3.406814  | -0.902596 |
| H | -9.998764  | 4.167178  | -1.208719 |
| H | -11.535958 | 3.956730  | 2.609589  |
| H | -11.015331 | 6.415924  | 4.172184  |
| H | -12.436171 | 6.564716  | 3.086623  |
| H | -11.214333 | 7.865278  | 3.151583  |
| H | -12.134895 | 6.467117  | 0.238962  |
| H | -10.525839 | 6.344154  | -0.529347 |
| H | -10.963450 | 7.806289  | 0.379558  |
| H | -8.897947  | 8.873143  | 1.581643  |
| H | -7.184371  | 7.672333  | 0.382391  |
| H | -6.963089  | 8.033431  | 2.773505  |
| H | -7.981838  | 1.352938  | -0.955521 |
| H | -6.266834  | 3.003948  | -0.522676 |
| H | -6.517494  | 1.078959  | 0.926877  |

Energy = - 770.625308 H

### TSAB Nucleophilic attack

|    |            |          |           |
|----|------------|----------|-----------|
| C  | -10.524858 | 3.394647 | -1.150181 |
| P  | -10.006814 | 3.062165 | 0.593731  |
| C  | -10.749508 | 1.415319 | 0.949155  |
| N  | -8.373799  | 3.102979 | 0.785295  |
| Si | -7.161981  | 2.447409 | -0.291358 |
| C  | -10.635797 | 4.142569 | 1.836714  |
| P  | -10.335742 | 5.890350 | 1.865836  |
| C  | -10.606335 | 6.788041 | 0.273366  |
| C  | -11.599998 | 6.602340 | 2.994633  |
| Si | -7.941442  | 7.621404 | 2.483390  |
| N  | -8.791524  | 6.093460 | 2.399838  |
| Y  | -8.175288  | 3.903652 | 3.015265  |
| O  | -8.505255  | 1.828510 | 3.847025  |
| C  | -8.190100  | 1.127262 | 4.868857  |
| O  | -7.213314  | 0.213050 | 4.766819  |

|   |            |           |           |
|---|------------|-----------|-----------|
| C | -6.553005  | 0.086417  | 3.507567  |
| C | -8.780692  | 1.257485  | 6.137268  |
| C | -8.150028  | 0.620955  | 7.346467  |
| C | -9.854344  | 2.161935  | 6.228856  |
| B | -5.694232  | 4.041838  | 3.148878  |
| H | -6.081577  | 3.294890  | 2.236568  |
| H | -4.498761  | 4.119220  | 3.189919  |
| H | -6.227454  | 5.142955  | 2.946533  |
| H | -6.179787  | 3.597949  | 4.196563  |
| B | -9.241234  | 4.621823  | 5.552468  |
| H | -8.035479  | 4.613010  | 5.353763  |
| H | -9.921932  | 4.442747  | 4.553683  |
| H | -9.633063  | 5.519322  | 6.250672  |
| H | -9.412161  | 3.501462  | 6.250796  |
| H | -10.494407 | 2.281937  | 5.360788  |
| H | -10.384449 | 2.221834  | 7.178759  |
| H | -7.177840  | 1.066604  | 7.595678  |
| H | -8.798879  | 0.729137  | 8.220529  |
| H | -7.977644  | -0.448690 | 7.190168  |
| H | -6.044148  | 1.013916  | 3.234322  |
| H | -7.261564  | -0.181699 | 2.719187  |
| H | -5.823996  | -0.712983 | 3.643036  |
| H | -10.459767 | 1.128127  | 1.962132  |
| H | -10.354396 | 0.686091  | 0.237099  |
| H | -11.838998 | 1.453014  | 0.864007  |
| H | -10.162249 | 2.597434  | -1.803820 |
| H | -11.615965 | 3.440579  | -1.199410 |
| H | -10.101016 | 4.343330  | -1.483380 |
| H | -11.592902 | 3.850968  | 2.263858  |
| H | -11.504169 | 6.115374  | 3.966890  |
| H | -12.603971 | 6.450767  | 2.589333  |
| H | -11.406276 | 7.671769  | 3.107252  |
| H | -11.605299 | 6.579854  | -0.117938 |
| H | -9.848019  | 6.473093  | -0.446190 |
| H | -10.499213 | 7.862877  | 0.446440  |
| H | -8.911455  | 8.773890  | 2.498745  |
| H | -7.044172  | 7.831428  | 1.301892  |
| H | -7.122246  | 7.687547  | 3.726442  |
| H | -7.780652  | 1.999443  | -1.588430 |
| H | -6.123158  | 3.470096  | -0.611564 |
| H | -6.482853  | 1.249360  | 0.295259  |

Energy = - 770.602067 H

#### Add B

|   |            |          |           |
|---|------------|----------|-----------|
| C | -10.605203 | 3.332134 | -1.107972 |
| P | -10.001897 | 3.042017 | 0.615834  |
| C | -10.670709 | 1.379849 | 1.032991  |
| N | -8.362425  | 3.140090 | 0.735343  |

|    |            |           |           |
|----|------------|-----------|-----------|
| Si | -7.172286  | 2.500748  | -0.377328 |
| C  | -10.605058 | 4.124120  | 1.870516  |
| P  | -10.313411 | 5.873863  | 1.881655  |
| C  | -10.534592 | 6.738701  | 0.264485  |
| C  | -11.615556 | 6.600443  | 2.958004  |
| Si | -7.951327  | 7.632297  | 2.536534  |
| N  | -8.788730  | 6.097415  | 2.461909  |
| Y  | -8.113380  | 3.881948  | 2.966116  |
| O  | -8.484464  | 1.921861  | 3.873679  |
| C  | -8.216114  | 1.162475  | 4.894145  |
| O  | -7.294861  | 0.181723  | 4.737490  |
| C  | -6.646075  | 0.074028  | 3.477973  |
| C  | -8.802906  | 1.302247  | 6.133227  |
| C  | -8.317434  | 0.568506  | 7.352404  |
| C  | -9.822361  | 2.327194  | 6.255103  |
| B  | -5.639532  | 4.075427  | 3.064409  |
| H  | -6.031428  | 3.244034  | 2.227868  |
| H  | -4.444585  | 4.162209  | 3.086986  |
| H  | -6.182450  | 5.149105  | 2.766583  |
| H  | -6.113591  | 3.718888  | 4.151084  |
| B  | -9.167443  | 4.670563  | 5.594900  |
| H  | -7.970486  | 4.585774  | 5.426734  |
| H  | -9.879663  | 4.519404  | 4.631402  |
| H  | -9.551060  | 5.442294  | 6.426922  |
| H  | -9.322768  | 3.442135  | 6.321380  |
| H  | -10.510472 | 2.413267  | 5.416365  |
| H  | -10.361493 | 2.325848  | 7.205697  |
| H  | -7.816012  | 1.242466  | 8.062660  |
| H  | -9.140229  | 0.086144  | 7.895666  |
| H  | -7.600070  | -0.207053 | 7.079068  |
| H  | -6.073488  | 0.974711  | 3.238543  |
| H  | -7.362247  | -0.118260 | 2.672864  |
| H  | -5.966850  | -0.774776 | 3.573233  |
| H  | -10.308169 | 1.120572  | 2.030423  |
| H  | -10.297922 | 0.652693  | 0.306906  |
| H  | -11.764003 | 1.383552  | 1.015482  |
| H  | -10.248444 | 2.535625  | -1.765619 |
| H  | -11.698364 | 3.343698  | -1.107200 |
| H  | -10.227883 | 4.287954  | -1.474716 |
| H  | -11.547949 | 3.828597  | 2.325665  |
| H  | -11.569209 | 6.113277  | 3.933745  |
| H  | -12.603514 | 6.459056  | 2.511972  |
| H  | -11.415226 | 7.667595  | 3.079850  |
| H  | -11.522043 | 6.526644  | -0.152868 |
| H  | -9.754852  | 6.404138  | -0.422851 |
| H  | -10.427105 | 7.816725  | 0.416915  |
| H  | -8.930490  | 8.774302  | 2.619823  |
| H  | -7.105791  | 7.881976  | 1.324674  |
| H  | -7.082248  | 7.675555  | 3.746506  |
| H  | -7.808443  | 2.136920  | -1.691581 |

|   |           |          |           |
|---|-----------|----------|-----------|
| H | -6.112407 | 3.515926 | -0.644142 |
| H | -6.522413 | 1.257718 | 0.145909  |

Energy = -770.602147 H

### TSBC Trapping

|    |            |           |           |
|----|------------|-----------|-----------|
| C  | -10.619179 | 3.483674  | -1.291561 |
| P  | -10.068891 | 3.075919  | 0.424915  |
| C  | -10.659716 | 4.109917  | 1.721930  |
| P  | -10.361062 | 5.849266  | 1.870408  |
| C  | -11.777825 | 6.550637  | 2.807221  |
| Y  | -8.163708  | 3.764150  | 2.823333  |
| O  | -8.457004  | 2.006670  | 3.985049  |
| C  | -8.211166  | 1.294189  | 5.065929  |
| O  | -7.421157  | 0.190039  | 4.908781  |
| C  | -6.505031  | 0.190186  | 3.826348  |
| C  | -10.823796 | 1.425550  | 0.733262  |
| N  | -8.429218  | 3.094205  | 0.576747  |
| Si | -7.246905  | 2.423123  | -0.530321 |
| B  | -5.702887  | 4.089792  | 2.743993  |
| N  | -8.919970  | 6.040606  | 2.661528  |
| Si | -8.054959  | 7.555941  | 2.841012  |
| C  | -10.346246 | 6.784059  | 0.279998  |
| C  | -8.708889  | 1.561107  | 6.304517  |
| C  | -8.282107  | 0.793857  | 7.524516  |
| C  | -9.720695  | 2.639313  | 6.466679  |
| B  | -9.288576  | 4.972439  | 5.121003  |
| H  | -6.068279  | 3.029386  | 2.209142  |
| H  | -4.513276  | 4.230717  | 2.701459  |
| H  | -6.304327  | 5.003643  | 2.163624  |
| H  | -6.132368  | 4.048166  | 3.907273  |
| H  | -8.092174  | 4.855659  | 5.063516  |
| H  | -10.009470 | 4.341582  | 4.405925  |
| H  | -9.750897  | 5.828821  | 5.811575  |
| H  | -9.277176  | 3.681168  | 6.324215  |
| H  | -10.554622 | 2.573665  | 5.762428  |
| H  | -10.124019 | 2.671632  | 7.483748  |
| H  | -7.949450  | 1.471522  | 8.323559  |
| H  | -9.099625  | 0.189688  | 7.944914  |
| H  | -7.457406  | 0.117141  | 7.294229  |
| H  | -5.801103  | 1.028217  | 3.888875  |
| H  | -7.014589  | 0.228037  | 2.858195  |
| H  | -5.953965  | -0.749331 | 3.905525  |
| H  | -10.544416 | 1.100877  | 1.738247  |
| H  | -10.432869 | 0.714328  | 0.001025  |
| H  | -11.912546 | 1.475119  | 0.645274  |
| H  | -10.262374 | 2.718773  | -1.985721 |
| H  | -11.711296 | 3.522324  | -1.318623 |
| H  | -10.208702 | 4.449643  | -1.589636 |

|   |            |          |           |
|---|------------|----------|-----------|
| H | -11.587270 | 3.783269 | 2.186436  |
| H | -11.878810 | 6.001248 | 3.745072  |
| H | -12.697539 | 6.467571 | 2.222815  |
| H | -11.571259 | 7.600468 | 3.028339  |
| H | -11.282433 | 6.632010 | -0.262504 |
| H | -9.500700  | 6.443131 | -0.321440 |
| H | -10.215839 | 7.849442 | 0.491356  |
| H | -8.988873  | 8.668667 | 3.234061  |
| H | -7.388611  | 7.987430 | 1.568928  |
| H | -7.025299  | 7.396363 | 3.903806  |
| H | -7.888481  | 2.071733 | -1.845521 |
| H | -6.162454  | 3.412026 | -0.794513 |
| H | -6.637697  | 1.166896 | 0.006864  |

Energy = - 770.596327 H

### Add C

|    |            |           |           |
|----|------------|-----------|-----------|
| C  | -10.605346 | 3.057055  | -0.813904 |
| P  | -9.832919  | 2.971241  | 0.864351  |
| C  | -10.518001 | 4.048896  | 2.081889  |
| P  | -10.465697 | 5.793816  | 1.978601  |
| C  | -11.880503 | 6.476670  | 2.917956  |
| Y  | -7.873271  | 4.107093  | 3.064975  |
| O  | -8.176894  | 2.434402  | 4.234139  |
| C  | -8.488378  | 1.315511  | 4.876599  |
| O  | -8.329955  | 0.168791  | 4.117498  |
| C  | -7.001699  | -0.050042 | 3.659253  |
| C  | -10.219444 | 1.260314  | 1.406917  |
| N  | -8.228918  | 3.346890  | 0.839008  |
| Si | -7.040034  | 2.831253  | -0.343219 |
| B  | -5.442750  | 4.524254  | 2.787375  |
| N  | -8.999701  | 6.365624  | 2.642565  |
| Si | -8.182412  | 7.856927  | 2.092584  |
| C  | -10.581940 | 6.492054  | 0.285263  |
| C  | -8.980575  | 1.227111  | 6.129293  |
| C  | -9.279290  | -0.094250 | 6.777074  |
| C  | -9.269250  | 2.454033  | 6.943924  |
| B  | -8.930114  | 6.195787  | 4.241556  |
| H  | -5.797960  | 3.424411  | 2.329332  |
| H  | -4.265418  | 4.707098  | 2.659369  |
| H  | -6.117368  | 5.387168  | 2.200635  |
| H  | -5.795202  | 4.529210  | 3.976683  |
| H  | -7.741185  | 6.031371  | 4.513054  |
| H  | -9.536650  | 5.160391  | 4.520277  |
| H  | -9.381336  | 7.128616  | 4.860680  |
| H  | -8.683188  | 2.458700  | 7.873865  |
| H  | -9.039981  | 3.371871  | 6.399261  |
| H  | -10.326325 | 2.492604  | 7.245663  |
| H  | -8.724054  | -0.206927 | 7.719151  |

|   |            |           |           |
|---|------------|-----------|-----------|
| H | -10.344815 | -0.178473 | 7.036761  |
| H | -9.023946  | -0.931590 | 6.125861  |
| H | -6.308351  | -0.145717 | 4.505129  |
| H | -6.654568  | 0.759256  | 3.007343  |
| H | -7.014712  | -0.986416 | 3.096824  |
| H | -9.700105  | 1.047025  | 2.345511  |
| H | -9.869408  | 0.566367  | 0.637693  |
| H | -11.298544 | 1.138398  | 1.535726  |
| H | -10.181101 | 2.278953  | -1.453264 |
| H | -11.682831 | 2.899581  | -0.716723 |
| H | -10.413091 | 4.028612  | -1.270728 |
| H | -11.306446 | 3.649357  | 2.712918  |
| H | -11.846768 | 6.077702  | 3.933098  |
| H | -12.814940 | 6.188334  | 2.431228  |
| H | -11.793592 | 7.564595  | 2.959184  |
| H | -11.507036 | 6.140851  | -0.176669 |
| H | -9.722151  | 6.163140  | -0.301533 |
| H | -10.590400 | 7.584399  | 0.329743  |
| H | -9.097189  | 9.033987  | 2.256265  |
| H | -7.831353  | 7.744366  | 0.645620  |
| H | -6.965506  | 8.033422  | 2.920747  |
| H | -7.704059  | 2.504173  | -1.653320 |
| H | -6.064094  | 3.931783  | -0.581023 |
| H | -6.297211  | 1.603948  | 0.084182  |

Energy = - 770.644992 H

**Add D (2<sup>nd</sup> insertion)**

|    |            |          |           |
|----|------------|----------|-----------|
| C  | -8.933476  | 5.886018 | -0.627879 |
| P  | -9.698946  | 6.322492 | 0.978429  |
| C  | -10.388676 | 8.008275 | 0.755262  |
| N  | -8.413534  | 6.438055 | 2.151530  |
| B  | -9.004144  | 6.752479 | 3.618938  |
| Y  | -7.805950  | 4.236920 | 3.135229  |
| B  | -6.570690  | 3.392129 | 1.108482  |
| C  | -10.997458 | 5.276154 | 1.416904  |
| P  | -10.925567 | 3.534585 | 1.610846  |
| C  | -10.709181 | 2.715629 | -0.025346 |
| Si | -7.033288  | 7.562296 | 1.883869  |
| O  | -6.150777  | 4.824231 | 4.297475  |
| C  | -5.271043  | 4.623083 | 5.259315  |
| C  | -5.333394  | 5.135146 | 6.515157  |
| C  | -6.466308  | 6.018354 | 6.946381  |
| N  | -9.805327  | 2.960034 | 2.701561  |
| Si | -9.869912  | 1.289334 | 3.226163  |
| O  | -8.000241  | 2.866254 | 5.022024  |
| C  | -7.652935  | 2.510905 | 6.157558  |
| O  | -8.329949  | 2.884610 | 7.234617  |
| C  | -9.479718  | 3.720352 | 7.026246  |

|   |            |          |           |
|---|------------|----------|-----------|
| O | -4.232226  | 3.774523 | 4.945521  |
| C | -3.582214  | 4.042734 | 3.710079  |
| C | -12.635956 | 3.086203 | 2.128849  |
| C | -6.532111  | 1.599703 | 6.456688  |
| C | -5.845082  | 1.094624 | 5.421282  |
| C | -6.227610  | 1.292281 | 7.895165  |
| C | -4.251866  | 4.893927 | 7.528091  |
| H | -6.484405  | 2.616516 | 2.074061  |
| H | -5.969529  | 2.988298 | 0.150181  |
| H | -7.776162  | 3.516719 | 0.873523  |
| H | -6.153702  | 4.494492 | 1.481515  |
| H | -9.099614  | 5.675331 | 4.249731  |
| H | -10.121589 | 7.220962 | 3.593080  |
| H | -8.220213  | 7.467938 | 4.206197  |
| H | -6.091962  | 6.991378 | 7.295675  |
| H | -7.168692  | 6.211091 | 6.132647  |
| H | -7.017530  | 5.584196 | 7.794767  |
| H | -4.650452  | 4.423059 | 8.439539  |
| H | -3.462551  | 4.253409 | 7.132541  |
| H | -3.796999  | 5.841218 | 7.853229  |
| H | -3.130702  | 5.044427 | 3.715066  |
| H | -4.266364  | 3.961156 | 2.861199  |
| H | -2.791104  | 3.295976 | 3.612286  |
| H | -12.848665 | 3.576177 | 3.081906  |
| H | -12.713854 | 2.003834 | 2.255591  |
| H | -13.349897 | 3.423531 | 1.374628  |
| H | -10.829204 | 1.636561 | 0.099239  |
| H | -11.448701 | 3.095966 | -0.733015 |
| H | -9.699541  | 2.910229 | -0.392096 |
| H | -11.601366 | 5.730383 | 2.201830  |
| H | -10.827403 | 8.334856 | 1.699127  |
| H | -11.155251 | 7.970630 | -0.020859 |
| H | -9.595882  | 8.702783 | 0.466768  |
| H | -9.733346  | 5.744907 | -1.356993 |
| H | -8.342660  | 4.974059 | -0.526390 |
| H | -8.275693  | 6.694966 | -0.950709 |
| H | -7.481127  | 8.978458 | 2.055994  |
| H | -6.542009  | 7.407248 | 0.477679  |
| H | -5.952679  | 7.222637 | 2.838720  |
| H | -10.468271 | 1.127877 | 4.593864  |
| H | -10.724245 | 0.455750 | 2.306877  |
| H | -8.512196  | 0.667479 | 3.237973  |
| H | -9.908321  | 3.869800 | 8.016347  |
| H | -9.183207  | 4.675608 | 6.590215  |
| H | -10.192343 | 3.220776 | 6.366490  |
| H | -5.980371  | 2.204661 | 8.446111  |
| H | -7.086031  | 0.834680 | 8.397377  |
| H | -5.379321  | 0.607799 | 7.964392  |
| H | -5.006498  | 0.425360 | 5.584346  |
| H | -6.093709  | 1.343735 | 4.396487  |



Energy = - 1116.190829 H

**TSDP 2<sup>nd</sup> insertion**

|    |            |          |           |
|----|------------|----------|-----------|
| C  | -9.013749  | 6.121949 | -0.453012 |
| P  | -9.700289  | 6.366907 | 1.228958  |
| C  | -10.456356 | 8.039073 | 1.204231  |
| N  | -8.353216  | 6.417430 | 2.339114  |
| B  | -8.850542  | 6.667386 | 3.850444  |
| Y  | -7.757717  | 4.144019 | 3.186745  |
| B  | -6.658326  | 3.493228 | 0.995637  |
| C  | -10.940258 | 5.236945 | 1.628285  |
| P  | -10.827726 | 3.486588 | 1.607751  |
| C  | -10.611137 | 2.870137 | -0.114818 |
| Si | -6.973978  | 7.533683 | 2.038375  |
| O  | -5.815908  | 4.632019 | 4.066589  |
| C  | -4.840736  | 4.513084 | 4.901562  |
| C  | -4.930966  | 4.688709 | 6.278893  |
| C  | -6.124562  | 5.394702 | 6.839042  |
| N  | -9.688201  | 2.837670 | 2.627963  |
| Si | -9.624926  | 1.118802 | 2.957028  |
| O  | -8.125654  | 2.977138 | 5.104691  |
| C  | -8.041064  | 2.672030 | 6.327341  |
| O  | -9.150301  | 2.635063 | 7.078913  |
| C  | -10.365758 | 3.089403 | 6.481599  |
| O  | -3.635531  | 4.130745 | 4.416637  |
| C  | -3.527560  | 3.904207 | 3.014403  |
| C  | -12.512819 | 2.913331 | 2.079174  |
| C  | -6.840643  | 2.346954 | 7.029007  |
| C  | -5.662505  | 2.376459 | 6.316362  |
| C  | -6.896412  | 2.065823 | 8.509394  |
| C  | -3.701480  | 4.617912 | 7.145203  |
| H  | -6.565998  | 2.621010 | 1.878031  |
| H  | -6.164262  | 3.127182 | -0.037665 |
| H  | -7.864030  | 3.715421 | 0.864542  |
| H  | -6.142247  | 4.523158 | 1.424753  |
| H  | -8.874990  | 5.573666 | 4.453212  |
| H  | -9.977382  | 7.106125 | 3.917243  |
| H  | -8.046893  | 7.381357 | 4.414235  |
| H  | -5.814621  | 6.178427 | 7.541106  |
| H  | -6.731600  | 5.859556 | 6.058585  |
| H  | -6.781786  | 4.706754 | 7.397834  |
| H  | -3.956400  | 4.242718 | 8.143893  |
| H  | -2.934360  | 3.967188 | 6.720361  |
| H  | -3.250445  | 5.610938 | 7.287219  |
| H  | -3.759876  | 4.809581 | 2.447078  |
| H  | -4.192245  | 3.104601 | 2.677809  |
| H  | -2.487894  | 3.618070 | 2.847279  |
| H  | -12.733963 | 3.266439 | 3.088949  |

|   |            |          |           |
|---|------------|----------|-----------|
| H | -12.543471 | 1.820573 | 2.067290  |
| H | -13.250572 | 3.311231 | 1.379428  |
| H | -10.680394 | 1.779711 | -0.109525 |
| H | -11.385061 | 3.291621 | -0.759739 |
| H | -9.620423  | 3.148035 | -0.477426 |
| H | -11.527893 | 5.588977 | 2.475391  |
| H | -10.907121 | 8.239172 | 2.176768  |
| H | -11.220946 | 8.059363 | 0.425383  |
| H | -9.691402  | 8.792378 | 1.001139  |
| H | -9.849800  | 5.959137 | -1.135546 |
| H | -8.337899  | 5.265426 | -0.462967 |
| H | -8.461123  | 7.013587 | -0.754834 |
| H | -7.400265  | 8.949040 | 2.265886  |
| H | -6.534618  | 7.409225 | 0.613585  |
| H | -5.858666  | 7.165984 | 2.942190  |
| H | -10.460591 | 0.711656 | 4.137131  |
| H | -10.136774 | 0.303360 | 1.799718  |
| H | -8.217356  | 0.698772 | 3.222061  |
| H | -11.124601 | 2.985138 | 7.257632  |
| H | -10.277511 | 4.136471 | 6.178356  |
| H | -10.625793 | 2.485017 | 5.610679  |
| H | -7.333607  | 2.892864 | 9.079250  |
| H | -7.501965  | 1.178155 | 8.725555  |
| H | -5.889725  | 1.884717 | 8.895534  |
| H | -4.732150  | 2.080015 | 6.789978  |
| H | -5.687317  | 2.323097 | 5.235161  |

Energy = -1116.181270 H

### Add E

|    |           |          |          |
|----|-----------|----------|----------|
| Y  | -7.794878 | 4.994017 | 2.851874 |
| O  | -7.834418 | 4.161724 | 4.744456 |
| C  | -8.009898 | 3.498756 | 5.878947 |
| C  | -7.066135 | 2.808488 | 6.555174 |
| C  | -5.674003 | 2.683724 | 5.994756 |
| C  | -4.538151 | 3.466279 | 6.723144 |
| C  | -4.293941 | 2.902750 | 8.119941 |
| C  | -4.880835 | 4.951733 | 6.841464 |
| C  | -3.239209 | 3.289239 | 5.911606 |
| N  | -8.870672 | 6.873102 | 1.481887 |
| Si | -8.100568 | 7.756453 | 0.130710 |
| B  | -8.502618 | 7.523137 | 2.907933 |
| B  | -5.486839 | 4.889660 | 1.949887 |
| N  | -8.652113 | 3.234374 | 1.523133 |
| Si | -7.753915 | 1.936511 | 0.751872 |
| O  | -4.327348 | 3.529481 | 9.157615 |
| O  | -3.994468 | 1.583758 | 8.084383 |
| C  | -3.730311 | 0.990088 | 9.354637 |
| O  | -9.322341 | 3.490648 | 6.325536 |

|   |            |           |           |
|---|------------|-----------|-----------|
| C | -9.827809  | 4.774423  | 6.662182  |
| C | -7.388487  | 2.089403  | 7.836681  |
| P | -10.466719 | 6.271252  | 1.422127  |
| C | -10.598371 | 4.864972  | 2.451342  |
| P | -10.242875 | 3.211202  | 1.949703  |
| C | -10.661608 | 2.163884  | 3.398935  |
| C | -10.869026 | 5.996512  | -0.347311 |
| C | -11.634071 | 7.547300  | 2.022719  |
| C | -11.308920 | 2.522073  | 0.604912  |
| H | -5.943197  | 3.768730  | 2.228038  |
| H | -4.368221  | 4.830975  | 1.524630  |
| H | -6.271545  | 5.400415  | 1.133785  |
| H | -5.560449  | 5.558222  | 2.992414  |
| H | -9.088250  | 6.861349  | 3.768449  |
| H | -8.791074  | 8.690765  | 3.011550  |
| H | -7.292838  | 7.360252  | 3.053992  |
| H | -5.803199  | 5.099030  | 7.407979  |
| H | -4.081999  | 5.498627  | 7.349914  |
| H | -5.017153  | 5.377092  | 5.842476  |
| H | -3.365722  | 3.729602  | 4.917146  |
| H | -2.396543  | 3.792646  | 6.398214  |
| H | -2.985483  | 2.232346  | 5.793138  |
| H | -4.604895  | 1.062689  | 10.007102 |
| H | -2.888123  | 1.483547  | 9.847419  |
| H | -3.493937  | -0.055068 | 9.151761  |
| H | -10.183717 | 2.573467  | 4.294025  |
| H | -10.294032 | 1.150544  | 3.216932  |
| H | -11.746422 | 2.134473  | 3.536271  |
| H | -11.096524 | 1.457279  | 0.481020  |
| H | -12.359779 | 2.654431  | 0.875042  |
| H | -11.100347 | 3.031619  | -0.336982 |
| H | -11.268825 | 4.980838  | 3.297999  |
| H | -11.417788 | 7.748186  | 3.073323  |
| H | -12.658978 | 7.186419  | 1.910954  |
| H | -11.490342 | 8.465034  | 1.448084  |
| H | -11.881630 | 5.593280  | -0.415522 |
| H | -10.156570 | 5.290734  | -0.778711 |
| H | -10.816819 | 6.940390  | -0.896552 |
| H | -8.903868  | 8.978155  | -0.202300 |
| H | -8.052628  | 6.890053  | -1.084227 |
| H | -6.736457  | 8.140304  | 0.565016  |
| H | -6.958241  | 1.137437  | 1.733175  |
| H | -8.693610  | 0.982923  | 0.064738  |
| H | -6.837780  | 2.504155  | -0.278023 |
| H | -10.858440 | 4.630444  | 6.995948  |
| H | -9.245473  | 5.222521  | 7.477821  |
| H | -9.814272  | 5.454927  | 5.802401  |
| H | -8.457682  | 2.124320  | 8.051815  |
| H | -7.083529  | 1.035774  | 7.779469  |
| H | -6.861219  | 2.524328  | 8.695568  |

|   |           |          |          |
|---|-----------|----------|----------|
| H | -5.670801 | 3.032987 | 4.957548 |
| H | -5.383395 | 1.624281 | 5.977010 |

Energy = -1116.214288 H

### Add A

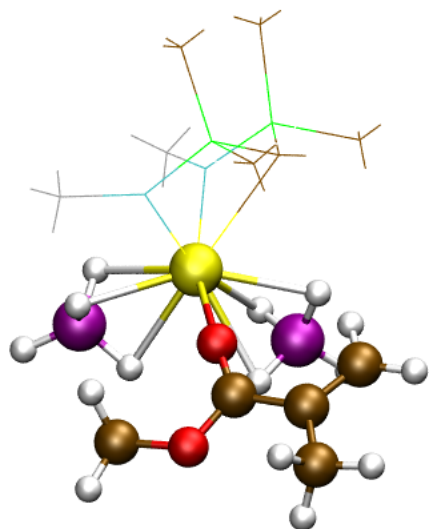

### TSAB Nucleophilic attack

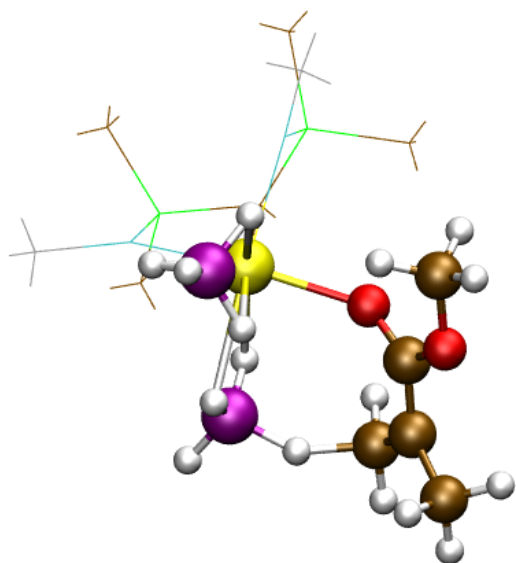

**Add B**

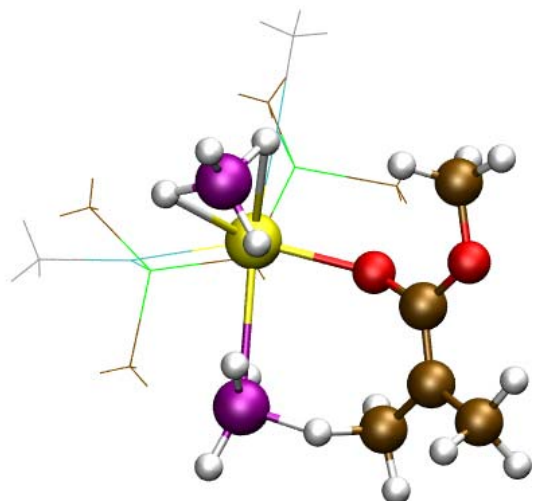

**TSBC Trapping**

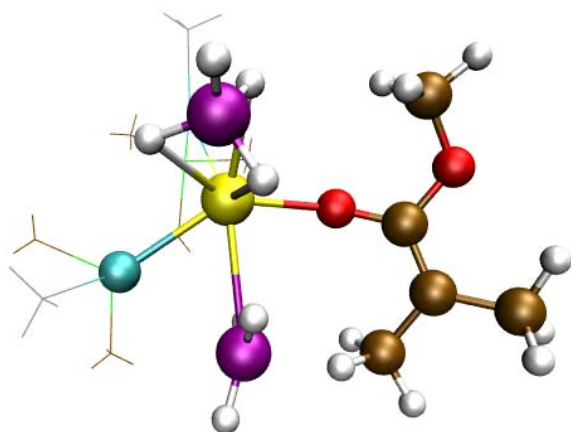

**Add C**

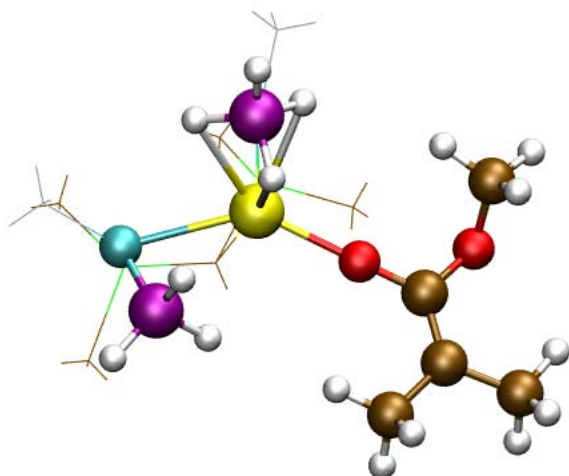

**Add D (2<sup>nd</sup> insertion)**

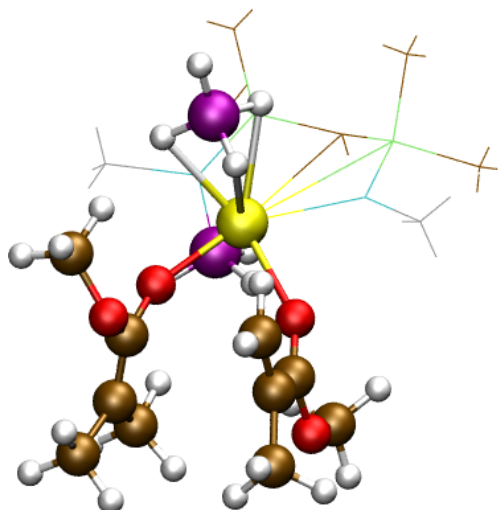

**TSDP 2<sup>nd</sup> insertion**

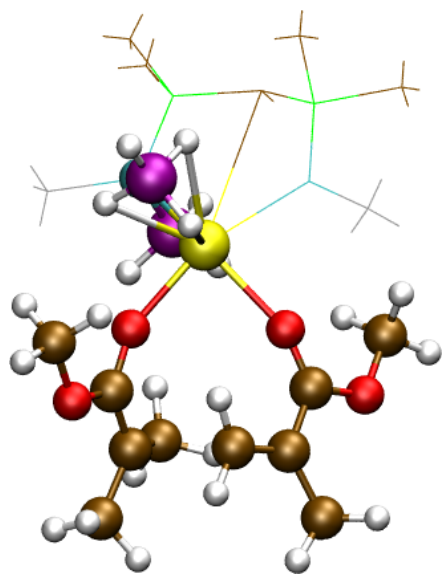

### Product

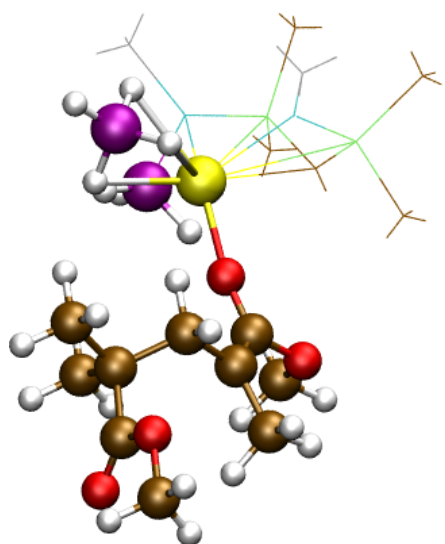

### Lanthanum complexes

#### Add A

|    |            |          |           |
|----|------------|----------|-----------|
| C  | -10.582325 | 3.426839 | -1.039043 |
| P  | -10.375351 | 3.253942 | 0.791384  |
| C  | -11.598015 | 1.948378 | 1.233011  |
| N  | -8.825163  | 2.836729 | 1.172176  |
| Si | -7.864864  | 1.659618 | 0.319313  |
| C  | -10.809758 | 4.645086 | 1.775004  |
| P  | -10.244991 | 6.303275 | 1.539010  |
| C  | -10.442334 | 6.975389 | -0.172413 |
| C  | -11.374255 | 7.345828 | 2.550029  |
| Si | -7.637344  | 7.770079 | 1.913675  |
| N  | -8.675972  | 6.365435 | 2.026732  |

|    |            |           |           |
|----|------------|-----------|-----------|
| La | -8.359154  | 4.187949  | 3.296644  |
| O  | -7.962480  | 1.764137  | 4.209574  |
| C  | -7.639459  | 0.857547  | 4.978172  |
| O  | -6.430543  | 0.314224  | 4.976472  |
| C  | -5.465873  | 0.845311  | 4.049769  |
| C  | -8.530175  | 0.238404  | 5.993711  |
| C  | -8.041065  | -0.981701 | 6.721864  |
| C  | -9.711203  | 0.826197  | 6.225923  |
| B  | -5.697004  | 4.604876  | 3.536090  |
| H  | -5.960838  | 3.865514  | 2.573335  |
| H  | -4.515664  | 4.811246  | 3.624669  |
| H  | -6.327580  | 5.660086  | 3.374534  |
| H  | -6.149820  | 4.068267  | 4.557279  |
| B  | -9.840403  | 4.584067  | 5.532697  |
| H  | -8.694055  | 4.203579  | 5.809088  |
| H  | -10.354962 | 3.731086  | 4.789652  |
| H  | -9.738500  | 5.625820  | 4.868549  |
| H  | -10.496162 | 4.755210  | 6.526915  |
| H  | -10.008839 | 1.730026  | 5.704446  |
| H  | -10.391893 | 0.426599  | 6.972077  |
| H  | -7.127431  | -0.765075 | 7.284409  |
| H  | -8.801664  | -1.338207 | 7.420208  |
| H  | -7.799304  | -1.792504 | 6.026862  |
| H  | -5.330068  | 1.916174  | 4.209153  |
| H  | -5.795602  | 0.669599  | 3.023767  |
| H  | -4.545025  | 0.300672  | 4.253539  |
| H  | -11.592606 | 1.818754  | 2.317311  |
| H  | -11.307534 | 1.008965  | 0.756703  |
| H  | -12.599979 | 2.233226  | 0.901726  |
| H  | -10.431636 | 2.457022  | -1.521783 |
| H  | -11.586338 | 3.794095  | -1.265240 |
| H  | -9.836795  | 4.124870  | -1.423963 |
| H  | -11.796262 | 4.576437  | 2.227000  |
| H  | -11.332133 | 6.991080  | 3.582164  |
| H  | -12.398170 | 7.284098  | 2.172133  |
| H  | -11.030180 | 8.382240  | 2.507623  |
| H  | -11.477746 | 6.863255  | -0.503772 |
| H  | -9.775159  | 6.436921  | -0.848055 |
| H  | -10.166790 | 8.033117  | -0.178151 |
| H  | -8.367018  | 8.924997  | 1.274165  |
| H  | -6.430456  | 7.493550  | 1.076713  |
| H  | -7.192376  | 8.233645  | 3.262433  |
| H  | -8.425017  | 0.264892  | 0.404229  |
| H  | -7.729139  | 1.965753  | -1.145446 |
| H  | -6.496797  | 1.642882  | 0.914221  |

Energy = - 763.885310 H

**TSAB Nucleophilic attack**



|    |            |           |           |
|----|------------|-----------|-----------|
| C  | -10.318864 | 3.760467  | -1.379976 |
| P  | -10.064795 | 3.159562  | 0.350076  |
| C  | -11.082618 | 1.627442  | 0.424949  |
| N  | -8.467956  | 2.878049  | 0.648760  |
| Si | -7.390056  | 2.030827  | -0.439850 |
| C  | -10.675386 | 4.190042  | 1.647481  |
| P  | -10.391820 | 5.931683  | 1.814097  |
| C  | -10.699137 | 6.949990  | 0.300480  |
| C  | -11.672425 | 6.525168  | 2.993581  |
| Si | -8.066028  | 7.688231  | 2.551421  |
| N  | -8.852786  | 6.137806  | 2.358749  |
| La | -8.113925  | 3.779945  | 2.978956  |
| O  | -8.312088  | 1.647935  | 4.077295  |
| C  | -8.017073  | 1.030990  | 5.160454  |
| O  | -6.969122  | 0.186705  | 5.172052  |
| C  | -6.227812  | 0.039852  | 3.963288  |
| C  | -8.695249  | 1.189389  | 6.374985  |
| C  | -8.122704  | 0.645362  | 7.656031  |
| C  | -9.826765  | 2.039852  | 6.352411  |
| B  | -5.446621  | 4.042956  | 2.915517  |
| H  | -5.847159  | 3.136289  | 2.163981  |
| H  | -4.253731  | 4.168072  | 2.861904  |
| H  | -6.029138  | 5.083566  | 2.569609  |
| H  | -5.836872  | 3.762890  | 4.060488  |
| B  | -9.356167  | 4.523451  | 5.685755  |
| H  | -8.145760  | 4.570497  | 5.530990  |
| H  | -10.006057 | 4.340090  | 4.666927  |
| H  | -9.818896  | 5.344731  | 6.430317  |
| H  | -9.479552  | 3.345015  | 6.343031  |
| H  | -10.422120 | 2.056087  | 5.443378  |
| H  | -10.430291 | 2.083436  | 7.259211  |
| H  | -7.226269  | 1.189259  | 7.983631  |
| H  | -8.858145  | 0.705095  | 8.464169  |
| H  | -7.832714  | -0.404460 | 7.546794  |
| H  | -5.767173  | 0.984774  | 3.662212  |
| H  | -6.863538  | -0.326565 | 3.152178  |
| H  | -5.452019  | -0.693302 | 4.187099  |
| H  | -11.020437 | 1.217634  | 1.435349  |
| H  | -10.678517 | 0.900214  | -0.283210 |
| H  | -12.124362 | 1.843708  | 0.174012  |
| H  | -10.011039 | 2.979129  | -2.080910 |
| H  | -11.371163 | 4.004232  | -1.546101 |
| H  | -9.701868  | 4.644622  | -1.549342 |
| H  | -11.651840 | 3.881091  | 2.015805  |
| H  | -11.570664 | 5.965121  | 3.925018  |
| H  | -12.672405 | 6.386946  | 2.574061  |
| H  | -11.500992 | 7.585580  | 3.192954  |
| H  | -11.689191 | 6.733931  | -0.108784 |
| H  | -9.932076  | 6.733709  | -0.445202 |
| H  | -10.639340 | 8.010337  | 0.563708  |

|   |           |          |           |
|---|-----------|----------|-----------|
| H | -9.025896 | 8.747162 | 3.025281  |
| H | -7.479235 | 8.195811 | 1.266756  |
| H | -6.974840 | 7.557007 | 3.557494  |
| H | -8.157602 | 1.122882 | -1.365596 |
| H | -6.599424 | 2.963062 | -1.305134 |
| H | -6.442864 | 1.184767 | 0.342375  |

Energy = -763.859781 H

### Add B

|    |            |           |           |
|----|------------|-----------|-----------|
| C  | -10.378053 | 3.692772  | -1.399460 |
| P  | -10.064073 | 3.156393  | 0.342328  |
| C  | -10.664444 | 4.215164  | 1.621035  |
| P  | -10.389130 | 5.962923  | 1.737779  |
| C  | -11.697253 | 6.587004  | 2.871290  |
| La | -8.083225  | 3.843188  | 2.925569  |
| O  | -8.343646  | 1.801824  | 4.090941  |
| C  | -8.089925  | 1.161091  | 5.184695  |
| O  | -7.081649  | 0.259099  | 5.182538  |
| C  | -6.339916  | 0.103953  | 3.979550  |
| C  | -11.040003 | 1.603868  | 0.498759  |
| N  | -8.452108  | 2.922400  | 0.605625  |
| Si | -7.387406  | 2.102529  | -0.517422 |
| B  | -5.423054  | 4.160173  | 2.873944  |
| N  | -8.863542  | 6.195396  | 2.307546  |
| Si | -8.089068  | 7.754599  | 2.474465  |
| C  | -10.669000 | 6.930684  | 0.186385  |
| C  | -8.774882  | 1.351767  | 6.373645  |
| C  | -8.305101  | 0.772252  | 7.679355  |
| C  | -9.869237  | 2.286191  | 6.336271  |
| B  | -9.312449  | 4.693688  | 5.667245  |
| H  | -5.800866  | 3.206459  | 2.170243  |
| H  | -4.231807  | 4.300930  | 2.825573  |
| H  | -6.018003  | 5.170563  | 2.465533  |
| H  | -5.821517  | 3.934942  | 4.028356  |
| H  | -8.105293  | 4.664189  | 5.533304  |
| H  | -9.980644  | 4.526941  | 4.667454  |
| H  | -9.752269  | 5.469189  | 6.468287  |
| H  | -9.462275  | 3.470257  | 6.355523  |
| H  | -10.472929 | 2.283918  | 5.430701  |
| H  | -10.491044 | 2.316419  | 7.233566  |
| H  | -7.813444  | 1.524738  | 8.313323  |
| H  | -9.137548  | 0.357329  | 8.261139  |
| H  | -7.584121  | -0.029787 | 7.511490  |
| H  | -5.829258  | 1.030143  | 3.698604  |
| H  | -6.980814  | -0.217959 | 3.152954  |
| H  | -5.599827  | -0.668959 | 4.192630  |
| H  | -10.929466 | 1.227739  | 1.518085  |
| H  | -10.643966 | 0.865072  | -0.201791 |

|   |            |          |           |
|---|------------|----------|-----------|
| H | -12.095567 | 1.786489 | 0.281242  |
| H | -10.078852 | 2.893199 | -2.083567 |
| H | -11.438728 | 3.914365 | -1.541652 |
| H | -9.781625  | 4.580447 | -1.616778 |
| H | -11.636796 | 3.912799 | 2.005579  |
| H | -11.624361 | 6.046484 | 3.816753  |
| H | -12.686624 | 6.443476 | 2.429135  |
| H | -11.526416 | 7.650621 | 3.053194  |
| H | -11.647547 | 6.695530 | -0.239572 |
| H | -9.882311  | 6.696861 | -0.533311 |
| H | -10.621568 | 7.999182 | 0.417101  |
| H | -9.057915  | 8.813772 | 2.929741  |
| H | -7.502185  | 8.246840 | 1.184001  |
| H | -7.000551  | 7.646921 | 3.486401  |
| H | -8.126615  | 1.047516 | -1.298165 |
| H | -6.786422  | 3.035813 | -1.524842 |
| H | -6.287182  | 1.435489 | 0.234430  |

Energy = -763.860070 H

### TSBC Trapping

|    |            |          |           |
|----|------------|----------|-----------|
| C  | -10.448322 | 3.885661 | -1.526979 |
| P  | -10.161450 | 3.172733 | 0.155028  |
| C  | -10.696965 | 4.134199 | 1.531311  |
| P  | -10.370118 | 5.842025 | 1.872055  |
| C  | -11.833540 | 6.473558 | 2.787436  |
| La | -8.126753  | 3.510266 | 2.777372  |
| O  | -8.277439  | 1.723410 | 4.202130  |
| C  | -7.963073  | 1.254835 | 5.391176  |
| O  | -6.941714  | 0.348017 | 5.448566  |
| C  | -6.149628  | 0.169731 | 4.289188  |
| C  | -11.237844 | 1.679200 | 0.168320  |
| N  | -8.568062  | 2.812610 | 0.381969  |
| Si | -7.544643  | 2.039323 | -0.811102 |
| B  | -5.512080  | 4.060120 | 2.538965  |
| N  | -8.977254  | 5.949370 | 2.756474  |
| Si | -8.134314  | 7.438532 | 3.140164  |
| C  | -10.267603 | 6.916867 | 0.375020  |
| C  | -8.586568  | 1.593239 | 6.556447  |
| C  | -8.100076  | 1.116281 | 7.896221  |
| C  | -9.785141  | 2.464075 | 6.505865  |
| B  | -9.488913  | 4.811736 | 5.115504  |
| H  | -5.799678  | 2.940340 | 2.079608  |
| H  | -4.341451  | 4.300297 | 2.423155  |
| H  | -6.208692  | 4.892593 | 1.937496  |
| H  | -5.869083  | 4.060199 | 3.729384  |
| H  | -8.290342  | 4.712104 | 5.156557  |
| H  | -10.146311 | 4.129769 | 4.380003  |
| H  | -10.022948 | 5.681295 | 5.734892  |

|   |            |           |           |
|---|------------|-----------|-----------|
| H | -9.529492  | 3.572595  | 6.368120  |
| H | -10.468990 | 2.220575  | 5.688537  |
| H | -10.342400 | 2.453517  | 7.448322  |
| H | -7.917790  | 1.958350  | 8.579228  |
| H | -8.830728  | 0.461500  | 8.393737  |
| H | -7.167093  | 0.558104  | 7.801834  |
| H | -5.635102  | 1.091888  | 3.994447  |
| H | -6.740350  | -0.195376 | 3.442069  |
| H | -5.404035  | -0.582130 | 4.556510  |
| H | -11.178209 | 1.211085  | 1.153309  |
| H | -10.874525 | 0.976054  | -0.584696 |
| H | -12.273852 | 1.949368  | -0.052014 |
| H | -10.187221 | 3.138893  | -2.282882 |
| H | -11.498791 | 4.164613  | -1.642106 |
| H | -9.814592  | 4.762420  | -1.669294 |
| H | -11.649804 | 3.803767  | 1.939327  |
| H | -11.985390 | 5.851510  | 3.671371  |
| H | -12.720718 | 6.444046  | 2.150169  |
| H | -11.637132 | 7.500129  | 3.105313  |
| H | -11.161472 | 6.796347  | -0.241270 |
| H | -9.376487  | 6.651485  | -0.197655 |
| H | -10.177608 | 7.961317  | 0.686786  |
| H | -9.059953  | 8.463911  | 3.735950  |
| H | -7.520134  | 8.073224  | 1.927507  |
| H | -7.061196  | 7.129324  | 4.124329  |
| H | -8.303339  | 1.005970  | -1.601065 |
| H | -6.985842  | 3.010896  | -1.807026 |
| H | -6.416948  | 1.359901  | -0.113331 |

Energy = -763.850196 H

### Add C

|    |            |          |           |
|----|------------|----------|-----------|
| C  | -10.932279 | 2.997629 | -0.437000 |
| P  | -9.981894  | 2.987337 | 1.151872  |
| C  | -10.453557 | 4.195106 | 2.347851  |
| P  | -10.375794 | 5.926456 | 2.108801  |
| C  | -11.701537 | 6.709534 | 3.100249  |
| La | -7.568785  | 4.155955 | 3.112364  |
| O  | -7.888438  | 2.358584 | 4.386377  |
| C  | -8.195470  | 1.157817 | 4.859907  |
| O  | -7.330562  | 0.148814 | 4.502297  |
| C  | -5.952271  | 0.434444 | 4.682613  |
| C  | -10.423665 | 1.362938 | 1.886472  |
| N  | -8.366816  | 3.201702 | 0.889432  |
| Si | -7.493129  | 2.522086 | -0.470280 |
| B  | -4.982533  | 4.595379 | 2.523823  |
| N  | -8.858661  | 6.536423 | 2.598823  |
| Si | -8.105203  | 7.984523 | 1.875289  |
| C  | -10.636590 | 6.474091 | 0.375916  |

|   |            |           |           |
|---|------------|-----------|-----------|
| C | -9.297050  | 0.856843  | 5.587027  |
| C | -9.554492  | -0.527480 | 6.108425  |
| C | -10.319435 | 1.903391  | 5.921984  |
| B | -8.662626  | 6.513183  | 4.196084  |
| H | -5.325401  | 3.421497  | 2.297126  |
| H | -3.822485  | 4.773287  | 2.271868  |
| H | -5.718636  | 5.331868  | 1.844726  |
| H | -5.233219  | 4.819336  | 3.721841  |
| H | -7.451485  | 6.411106  | 4.398780  |
| H | -9.224429  | 5.501311  | 4.627225  |
| H | -9.097631  | 7.492924  | 4.754067  |
| H | -10.432032 | 2.014670  | 7.009878  |
| H | -10.048251 | 2.880914  | 5.516093  |
| H | -11.316771 | 1.635244  | 5.539602  |
| H | -9.675572  | -0.521999 | 7.201339  |
| H | -10.485957 | -0.947067 | 5.699669  |
| H | -8.740490  | -1.209001 | 5.857414  |
| H | -5.731603  | 0.679411  | 5.730347  |
| H | -5.613530  | 1.258099  | 4.045320  |
| H | -5.413020  | -0.473931 | 4.405904  |
| H | -9.967169  | 1.266440  | 2.876137  |
| H | -10.039305 | 0.573503  | 1.235802  |
| H | -11.510158 | 1.269759  | 1.967915  |
| H | -10.665224 | 2.113696  | -1.023994 |
| H | -12.003683 | 2.974863  | -0.221580 |
| H | -10.690423 | 3.888321  | -1.018596 |
| H | -11.178512 | 3.876095  | 3.091256  |
| H | -11.578995 | 6.410010  | 4.142440  |
| H | -12.675627 | 6.385284  | 2.727444  |
| H | -11.609931 | 7.795575  | 3.030394  |
| H | -11.603631 | 6.098945  | 0.034780  |
| H | -9.839852  | 6.076666  | -0.255991 |
| H | -10.630531 | 7.565618  | 0.317247  |
| H | -8.973188  | 9.189645  | 2.079227  |
| H | -7.927587  | 7.786055  | 0.405440  |
| H | -6.792225  | 8.176037  | 2.538338  |
| H | -7.789739  | 1.061889  | -0.670866 |
| H | -7.855965  | 3.205018  | -1.759187 |
| H | -6.035052  | 2.694744  | -0.230179 |

Energy = -763.899989 H

**Add D (2<sup>nd</sup> insertion)**

|    |            |          |           |
|----|------------|----------|-----------|
| C  | -9.919731  | 6.264424 | -0.375617 |
| P  | -10.003619 | 6.262125 | 1.453781  |
| C  | -11.272801 | 7.503735 | 1.915415  |
| N  | -8.497418  | 6.810601 | 2.051755  |
| B  | -8.498740  | 7.123286 | 3.623671  |
| La | -7.564442  | 4.448734 | 3.123273  |

|    |            |          |           |
|----|------------|----------|-----------|
| B  | -6.444682  | 4.296293 | 0.630489  |
| C  | -10.477481 | 4.738538 | 2.138513  |
| P  | -10.275972 | 3.047007 | 1.698279  |
| C  | -10.249089 | 2.776105 | -0.121524 |
| Si | -7.443150  | 7.940394 | 1.160817  |
| O  | -5.679838  | 4.058039 | 4.274914  |
| C  | -4.611543  | 3.857074 | 5.032983  |
| C  | -4.380952  | 4.417477 | 6.244364  |
| C  | -5.369295  | 5.349927 | 6.879303  |
| N  | -8.941696  | 2.418475 | 2.429553  |
| Si | -8.394649  | 0.766420 | 2.343236  |
| O  | -8.615632  | 3.810509 | 5.434074  |
| C  | -8.732752  | 3.374734 | 6.579033  |
| O  | -9.654630  | 3.853714 | 7.414597  |
| C  | -10.469050 | 4.926937 | 6.927647  |
| O  | -3.716469  | 2.931086 | 4.545363  |
| C  | -3.310077  | 3.137811 | 3.200004  |
| C  | -11.806398 | 2.197729 | 2.273505  |
| C  | -7.922209  | 2.298407 | 7.192442  |
| C  | -6.844033  | 1.872642 | 6.517665  |
| C  | -8.330266  | 1.776266 | 8.542169  |
| C  | -3.128676  | 4.138482 | 7.024811  |
| H  | -6.223489  | 3.267212 | 1.276620  |
| H  | -5.973051  | 4.242257 | -0.476017 |
| H  | -7.678750  | 4.433399 | 0.583386  |
| H  | -5.997368  | 5.257684 | 1.272680  |
| H  | -9.236446  | 6.300470 | 4.166024  |
| H  | -8.854304  | 8.246594 | 3.905154  |
| H  | -7.346551  | 6.936101 | 4.020242  |
| H  | -4.896137  | 6.305459 | 7.146623  |
| H  | -6.207333  | 5.571988 | 6.215241  |
| H  | -5.776944  | 4.936886 | 7.815443  |
| H  | -3.353064  | 3.662093 | 7.991299  |
| H  | -2.451312  | 3.482285 | 6.476322  |
| H  | -2.592369  | 5.069387 | 7.260941  |
| H  | -2.787050  | 4.098026 | 3.090515  |
| H  | -4.155776  | 3.112923 | 2.507035  |
| H  | -2.619623  | 2.326184 | 2.959209  |
| H  | -11.913827 | 2.371213 | 3.346601  |
| H  | -11.714231 | 1.122453 | 2.100524  |
| H  | -12.679403 | 2.588296 | 1.745730  |
| H  | -10.217411 | 1.699407 | -0.307706 |
| H  | -11.138201 | 3.203454 | -0.590005 |
| H  | -9.341288  | 3.222577 | -0.530916 |
| H  | -11.055938 | 4.854862 | 3.051873  |
| H  | -11.336885 | 7.539687 | 3.004432  |
| H  | -12.238064 | 7.221171 | 1.490461  |
| H  | -10.965485 | 8.486606 | 1.550472  |
| H  | -10.855592 | 5.860723 | -0.766162 |
| H  | -9.074986  | 5.656838 | -0.704059 |

|   |            |           |           |
|---|------------|-----------|-----------|
| H | -9.787578  | 7.287951  | -0.734036 |
| H | -8.079489  | 9.298710  | 1.106012  |
| H | -7.225917  | 7.477001  | -0.238849 |
| H | -6.154627  | 8.026863  | 1.894576  |
| H | -9.336679  | -0.186494 | 3.028221  |
| H | -8.233125  | 0.258360  | 0.938649  |
| H | -7.072662  | 0.684875  | 3.032445  |
| H | -11.082181 | 5.233660  | 7.774426  |
| H | -9.849012  | 5.753870  | 6.576119  |
| H | -11.101997 | 4.580538  | 6.106540  |
| H | -8.310626  | 2.568250  | 9.297544  |
| H | -9.349986  | 1.377123  | 8.527464  |
| H | -7.652884  | 0.980293  | 8.859605  |
| H | -6.202564  | 1.098166  | 6.926894  |
| H | -6.563157  | 2.301794  | 5.562370  |

Energy = -1109.454139 H

### **TSDP 2<sup>nd</sup> insertion**

|    |            |          |           |
|----|------------|----------|-----------|
| C  | -9.968338  | 6.369624 | -0.331942 |
| P  | -10.025981 | 6.307934 | 1.497155  |
| C  | -11.304679 | 7.514891 | 2.018160  |
| N  | -8.516753  | 6.852237 | 2.090146  |
| B  | -8.503141  | 7.133977 | 3.667259  |
| La | -7.585010  | 4.477079 | 3.109687  |
| B  | -6.433740  | 4.412488 | 0.620197  |
| C  | -10.457343 | 4.754035 | 2.143393  |
| P  | -10.253383 | 3.084724 | 1.619324  |
| C  | -10.262625 | 2.894958 | -0.210820 |
| Si | -7.479395  | 8.006870 | 1.209039  |
| O  | -5.492717  | 4.177882 | 4.100750  |
| C  | -4.664009  | 3.812289 | 5.018226  |
| C  | -4.735827  | 4.158471 | 6.361092  |
| C  | -5.613697  | 5.293386 | 6.781683  |
| N  | -8.894398  | 2.451820 | 2.292535  |
| Si | -8.309950  | 0.819606 | 2.151052  |
| O  | -8.489210  | 3.692776 | 5.306243  |
| C  | -8.484152  | 3.413312 | 6.529496  |
| O  | -9.539412  | 3.743725 | 7.295882  |
| C  | -10.605060 | 4.445954 | 6.663807  |
| O  | -3.664916  | 2.965756 | 4.656852  |
| C  | -3.595191  | 2.589037 | 3.286764  |
| C  | -11.758775 | 2.189599 | 2.188702  |
| C  | -7.441679  | 2.734619 | 7.248208  |
| C  | -6.360753  | 2.285600 | 6.533548  |
| C  | -7.565133  | 2.561701 | 8.740974  |
| C  | -3.666790  | 3.725742 | 7.327563  |
| H  | -6.204096  | 3.372946 | 1.247539  |
| H  | -5.957355  | 4.384100 | -0.485625 |

|   |            |           |           |
|---|------------|-----------|-----------|
| H | -7.670297  | 4.535826  | 0.571149  |
| H | -6.003475  | 5.365232  | 1.284522  |
| H | -9.220563  | 6.287224  | 4.201214  |
| H | -8.872313  | 8.244152  | 3.978324  |
| H | -7.343079  | 6.953141  | 4.042728  |
| H | -5.047554  | 6.023826  | 7.373917  |
| H | -6.043435  | 5.821276  | 5.926206  |
| H | -6.452894  | 4.952811  | 7.412209  |
| H | -4.093149  | 3.553842  | 8.323886  |
| H | -3.168725  | 2.808892  | 7.005439  |
| H | -2.891708  | 4.497438  | 7.447722  |
| H | -3.542885  | 3.462696  | 2.632082  |
| H | -4.454887  | 1.981516  | 2.986883  |
| H | -2.682905  | 1.996872  | 3.194788  |
| H | -11.841272 | 2.309506  | 3.271174  |
| H | -11.656569 | 1.125315  | 1.961769  |
| H | -12.649482 | 2.592075  | 1.700869  |
| H | -10.236107 | 1.827330  | -0.444488 |
| H | -11.160615 | 3.341546  | -0.643084 |
| H | -9.362680  | 3.358488  | -0.618423 |
| H | -11.040885 | 4.827855  | 3.057845  |
| H | -11.354079 | 7.513718  | 3.108549  |
| H | -12.271731 | 7.232054  | 1.597351  |
| H | -11.016929 | 8.513654  | 1.681488  |
| H | -10.906698 | 5.971696  | -0.722438 |
| H | -9.124046  | 5.779372  | -0.691675 |
| H | -9.848755  | 7.405190  | -0.659026 |
| H | -8.135723  | 9.356421  | 1.178700  |
| H | -7.265749  | 7.566823  | -0.198410 |
| H | -6.188871  | 8.100395  | 1.937702  |
| H | -9.241183  | -0.185126 | 2.771236  |
| H | -8.089026  | 0.375645  | 0.733159  |
| H | -7.003773  | 0.741741  | 2.874606  |
| H | -11.313677 | 4.679909  | 7.459161  |
| H | -10.245821 | 5.364324  | 6.192400  |
| H | -11.088807 | 3.820140  | 5.907617  |
| H | -7.667797  | 3.516790  | 9.267134  |
| H | -8.443165  | 1.960428  | 9.004225  |
| H | -6.680511  | 2.053845  | 9.134227  |
| H | -5.595312  | 1.686016  | 7.014764  |
| H | -6.413716  | 2.229276  | 5.453660  |

Energy = -1109.447822 H

### Product

|   |            |          |           |
|---|------------|----------|-----------|
| C | -9.841536  | 6.208084 | -0.498994 |
| P | -9.988813  | 6.328221 | 1.322496  |
| C | -11.187461 | 7.673502 | 1.663295  |
| N | -8.466275  | 6.794545 | 1.931784  |



|    |            |          |           |
|----|------------|----------|-----------|
| B  | -8.478633  | 7.207631 | 3.482726  |
| La | -7.831252  | 4.433507 | 3.228678  |
| B  | -6.365238  | 4.060475 | 0.906764  |
| C  | -10.556688 | 4.876365 | 2.095576  |
| P  | -10.524376 | 3.162220 | 1.676484  |
| C  | -10.576148 | 2.843179 | -0.136494 |
| Si | -7.301827  | 7.778968 | 1.008477  |
| O  | -5.482763  | 4.400379 | 4.236695  |
| C  | -4.653381  | 3.991020 | 5.053035  |
| C  | -4.985807  | 3.667837 | 6.492728  |
| C  | -5.512286  | 4.977160 | 7.110503  |
| N  | -9.219659  | 2.464973 | 2.378787  |
| Si | -8.743552  | 0.792846 | 2.315064  |
| O  | -8.383597  | 3.820006 | 5.356206  |
| C  | -8.387002  | 3.432065 | 6.608607  |
| O  | -9.512169  | 3.730161 | 7.341095  |
| C  | -10.695809 | 3.989551 | 6.617590  |
| O  | -3.390884  | 3.807215 | 4.700644  |
| C  | -3.055478  | 4.106342 | 3.331951  |
| C  | -12.104133 | 2.463485 | 2.313089  |
| C  | -7.363823  | 2.794658 | 7.238859  |
| C  | -6.105839  | 2.531525 | 6.470368  |
| C  | -7.447970  | 2.362867 | 8.675419  |
| C  | -3.759670  | 3.183241 | 7.273538  |
| H  | -6.301481  | 3.098567 | 1.691202  |
| H  | -5.689241  | 3.862219 | -0.071554 |
| H  | -7.560811  | 4.213909 | 0.618780  |
| H  | -5.996884  | 5.072385 | 1.517237  |
| H  | -9.298931  | 6.490275 | 4.056753  |
| H  | -8.739018  | 8.373390 | 3.678985  |
| H  | -7.356683  | 6.942984 | 3.920710  |
| H  | -4.739243  | 5.754053 | 7.083498  |
| H  | -6.396106  | 5.338975 | 6.583491  |
| H  | -5.788072  | 4.803315 | 8.152845  |
| H  | -4.060884  | 2.951935 | 8.299854  |
| H  | -3.333486  | 2.276740 | 6.833948  |
| H  | -2.971875  | 3.941759 | 7.311817  |
| H  | -3.160285  | 5.177543 | 3.147168  |
| H  | -3.708597  | 3.562448 | 2.647603  |
| H  | -2.017599  | 3.796543 | 3.216947  |
| H  | -12.158348 | 2.659489 | 3.386136  |
| H  | -12.111287 | 1.382305 | 2.153456  |
| H  | -12.956853 | 2.921594 | 1.806502  |
| H  | -10.639283 | 1.762676 | -0.291291 |
| H  | -11.440677 | 3.328135 | -0.595368 |
| H  | -9.647840  | 3.198253 | -0.586828 |
| H  | -11.212046 | 5.081898 | 2.938583  |
| H  | -11.279316 | 7.783975 | 2.745599  |
| H  | -12.157300 | 7.424250 | 1.227598  |
| H  | -10.808587 | 8.609242 | 1.245373  |

|   |            |           |           |
|---|------------|-----------|-----------|
| H | -10.787210 | 5.848083  | -0.907833 |
| H | -9.029304  | 5.525382  | -0.755414 |
| H | -9.621227  | 7.195930  | -0.910648 |
| H | -7.847517  | 9.163368  | 0.810829  |
| H | -7.049244  | 7.190452  | -0.337708 |
| H | -6.045290  | 7.854118  | 1.796153  |
| H | -9.781804  | -0.125691 | 2.898295  |
| H | -8.477147  | 0.299665  | 0.921341  |
| H | -7.489913  | 0.643547  | 3.114220  |
| H | -11.457361 | 4.225450  | 7.365008  |
| H | -10.582453 | 4.838350  | 5.934998  |
| H | -11.021765 | 3.112023  | 6.042035  |
| H | -6.808068  | 2.960184  | 9.344335  |
| H | -8.469650  | 2.447217  | 9.051462  |
| H | -7.127372  | 1.317962  | 8.796097  |
| H | -5.629985  | 1.619595  | 6.852327  |
| H | -6.365273  | 2.321832  | 5.426232  |

Energy = -1109.474022 H

### Add A

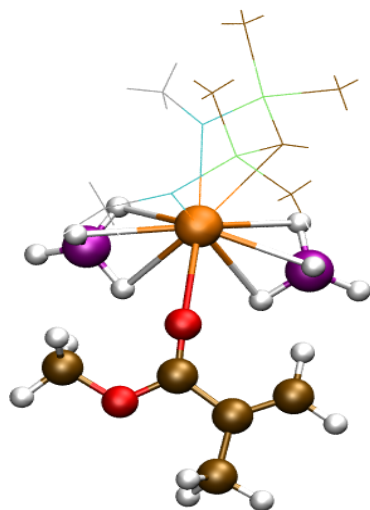

### TSAB Nucleophilic attack

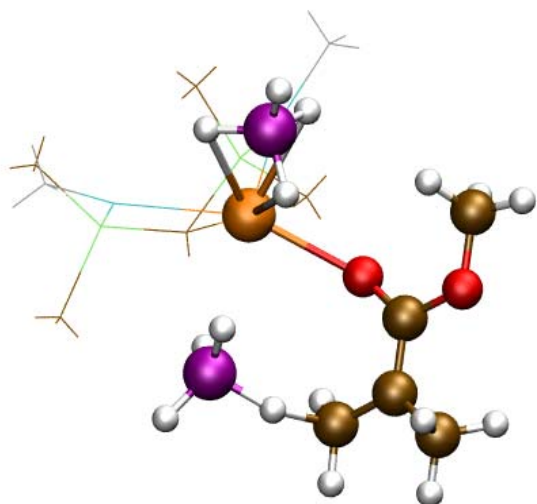

**Add B**

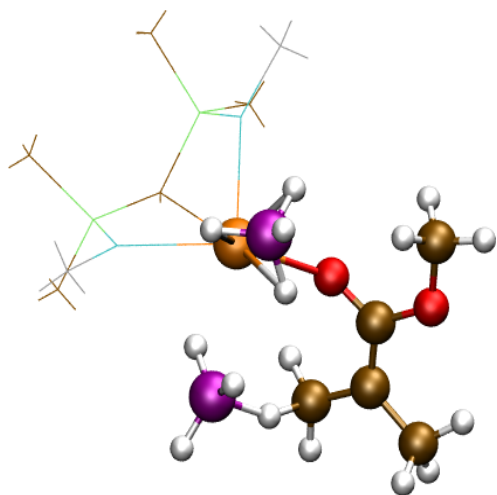

**TSBC Trapping**

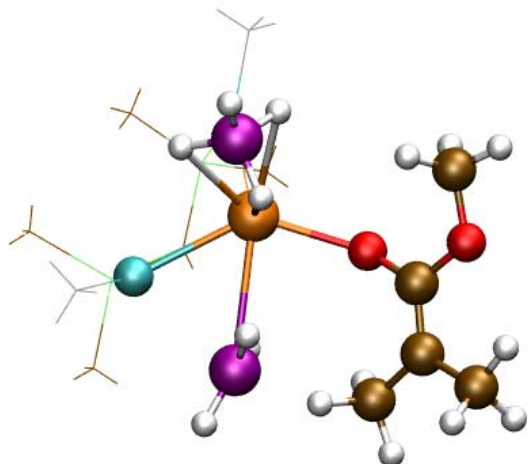

**Add C**

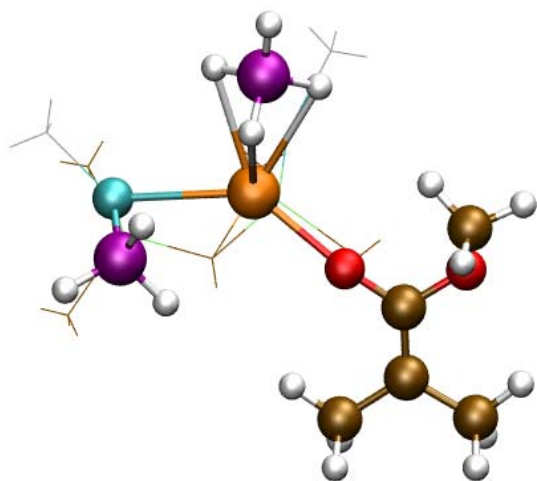

**Add D (2<sup>nd</sup> insertion)**

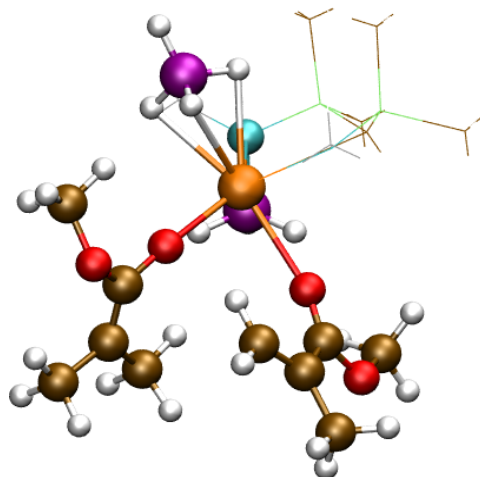

**TSDE 2<sup>nd</sup> insertion**

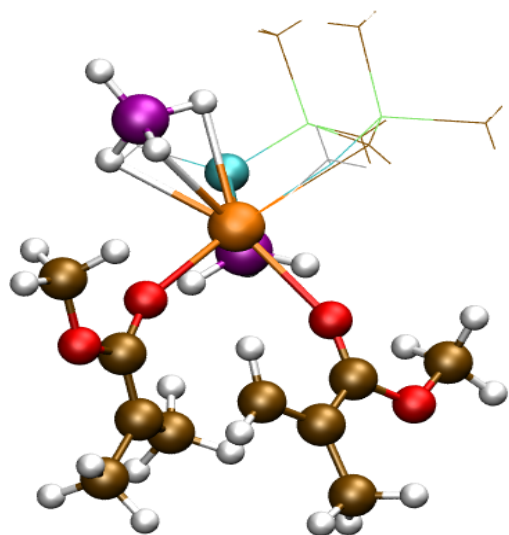

**Add E**

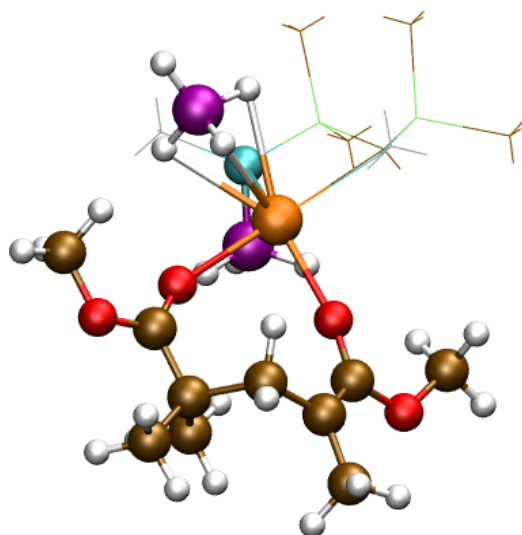

Supplement: c1py00133g.pdf [file c1py00133g.pdf]
